# Supplementary material for: First Record of Alternaria pogostemonis: A Novel Species Causing Leaf Spots in Pogostemon cablin
Source: MDPI journal article supplement (doi:10.3390/pathogens11101105), 2022-09-27
Supplement: s1 [file s1]

**Table S1.** Strains used for the phylogenetic analyses in this study and their GenBank accession Numbers

| Name                              | Culture<br>Collection<br>number <sup>1</sup> | GenBank accession numbers <sup>2</sup> |              |             |               |                |
|-----------------------------------|----------------------------------------------|----------------------------------------|--------------|-------------|---------------|----------------|
|                                   |                                              | ITS                                    | <i>gapdh</i> | <i>rpb2</i> | <i>tef1-α</i> | <i>Alt-a 1</i> |
| <i>Alternaria alstroemeriae</i>   | CBS 118808                                   | KP124296                               | KP124153     | KP124764    | KP125071      | KP123845       |
| <i>Alternaria alstroemeriae</i>   | CBS 118809                                   | KP124297                               | KP124154     | KP124765    | KP125072      | -              |
| <i>Alternaria alternata</i>       | CBS 174.52                                   | KC584228                               | KC584152     | DQ677964    | KC584704      | KP123856       |
| <i>Alternaria alternata</i>       | CBS 916.96 <sup>T</sup>                      | AF347031                               | AY278808     | KC584375    | KC584634      | AY563301       |
| <i>Alternaria alternata</i>       | CBS 102595                                   | FJ266476                               | AY562411     | KC584408    | KC584666      | AY563306       |
| <i>Alternaria alternata</i>       | JZB3180002                                   | MH827031                               | MH853645     | MH853718    | MH853703      | MH853692       |
| <i>Alternaria anigozanthi</i>     | CBS 121920 <sup>T</sup>                      | KC584180                               | KC584097     | KC584376    | KC584635      | -              |
| <i>Alternaria arborescens</i>     | CBS 102605 <sup>T</sup>                      | AF347033                               | AY278810     | KC584377    | KC584636      | AY563303       |
| <i>Alternaria arborescens</i>     | CBS 101.13                                   | KP124392                               | KP124244     | KP124862    | KP125170      | KP123940       |
| <i>Alternaria arborescens</i>     | CBS 112633                                   | KP124400                               | KP124252     | KP124870    | KP125178      | KP123947       |
| <i>Alternaria aspera</i>          | CBS 115269 <sup>T</sup>                      | KC584242                               | KC584166     | KC584474    | KC584734      | KF533899       |
| <i>Alternaria betae-kenyensis</i> | CBS 118810 <sup>T</sup>                      | KP124419                               | KP124270     | KP124888    | KP125197      | KP123966       |
| <i>Alternaria brassicicola</i>    | CBS 118699                                   | JX499031                               | KC584103     | KC584383    | KC584642      | -              |
| <i>Alternaria burnsii</i>         | CBS 108.27                                   | KC584236                               | KC584162     | KC584468    | KC584727      | KP123850       |
| <i>Alternaria burnsii</i>         | CBS 107.38 <sup>T</sup>                      | KP124420                               | JQ646305     | KP124889    | KP125198      | KP123967       |
| <i>Alternaria burnsii</i>         | YZU 191003                                   | MN656136                               | MN718662     | MN656154    | MN656146      | MN656141       |
| <i>Alternaria carotiincultae</i>  | CBS 109381 <sup>T</sup>                      | KC584188                               | KC584106     | KC584386    | KC584645      | -              |

|                                   |                         |          |          |          |          |          |
|-----------------------------------|-------------------------|----------|----------|----------|----------|----------|
| <i>Alternaria cheiranthi</i>      | CBS 109384              | AF229457 | KC584107 | KC584387 | KC584646 | JQ905106 |
| <i>Alternaria cinerariae</i>      | CBS 116495              | KC584190 | KC584109 | KC584389 | KC584648 | -        |
| <i>Alternaria cucurbitae</i>      | CBS 483.81              | FJ266483 | AY562418 | KC584483 | KC584743 | -        |
| <i>Alternaria dauci</i>           | CBS 117097              | KC584192 | KC584111 | KC584392 | KC584651 | KJ718678 |
| <i>Alternaria dianthicola</i>     | CBS 116491              | KC584194 | KC584113 | KC584394 | KC584653 | -        |
| <i>Alternaria eichhorniae</i>     | CBS 489.92 <sup>T</sup> | KC146356 | KP124276 | KP124895 | KP125204 | KP123973 |
| <i>Alternaria eichhorniae</i>     | CBS 119778              | KP124426 | KP124277 | KP124896 | KP125205 | -        |
| <i>Alternaria gaisen</i>          | CBS 632.93              | KC584197 | KC584116 | KC584399 | KC584658 | KP123974 |
| <i>Alternaria gaisen</i>          | CBS 118488              | KP124427 | KP124278 | KP125206 | KP124897 | KP123975 |
| <i>Alternaria gossypina</i>       | CBS 100.23              | KP124429 | KP124280 | KP124899 | KP125208 | KP123977 |
| <i>Alternaria gossypina</i>       | CBS 104.32 <sup>T</sup> | KP124430 | JQ646312 | KP124900 | KP125209 | JQ646395 |
| <i>Alternaria gypsophila</i>      | CBS 107.41 <sup>T</sup> | KC584199 | KC584118 | KC584401 | KC584660 | JQ646304 |
| <i>Alternaria iridialustralis</i> | CBS 118486 <sup>T</sup> | KP124435 | KP124284 | KP124905 | KP125214 | KP123981 |
| <i>Alternaria iridialustralis</i> | CBS 118404              | KP124434 | KP124283 | KP124904 | KP125213 | KP123980 |
| <i>Alternaria jacinthicola</i>    | CBS 133751 <sup>T</sup> | KP124438 | KP124287 | KP124908 | KP125217 | KP123984 |
| <i>Alternaria jacinthicola</i>    | CPC 25267               | KP124439 | KP124288 | KP124909 | KP125218 | KP123985 |
| <i>Alternaria japonica</i>        | CBS 118390              | KC584201 | KC584121 | KC584405 | KC584663 | -        |
| <i>Alternaria juxtiseptata</i>    | CBS 119673 <sup>T</sup> | KC584202 | KC584122 | KC584406 | KC584664 | -        |
| <i>Alternaria leucanthemi</i>     | CBS 421.65 <sup>T</sup> | KC584240 | KC584164 | KC584472 | KC584732 | -        |
| <i>Alternaria longipes</i>        | CBS 540.94              | AY278835 | AY278811 | KC584409 | KC584667 | AY563304 |
| <i>Alternaria longipes</i>        | CBS 917.96              | KP124442 | KP124291 | KP124912 | KP125226 | KP123988 |

|                                 |                         |                 |                 |                 |                 |                 |
|---------------------------------|-------------------------|-----------------|-----------------|-----------------|-----------------|-----------------|
| <i>Alternaria longipes</i>      | CBS 121333              | KP124444        | KP124293        | KP124914        | KP125223        | KP123990        |
| <i>Alternaria macrospora</i>    | CBS 117228 <sup>T</sup> | KC584204        | KC584124        | KC584410        | KC584668        | KJ718702        |
| <i>Alternaria nepalensis</i>    | CBS 118700 <sup>T</sup> | KC584207        | KC584126        | KC584414        | KC584672        | -               |
| <i>Alternaria nobilis</i>       | CBS 116490              | KC584208        | KC584127        | KC584415        | KC584673        | JQ646385        |
| <i>Alternaria obovoidea</i>     | CBS 101229              | FJ266487        | FJ266498        | KC584485        | KC584745        | FJ266513        |
| <i>Alternaria panax</i>         | CBS 482.81              | KC584209        | KC584128        | KC584417        | KC584675        | -               |
| <i>Alternaria perpunctulata</i> | CBS 115267 <sup>T</sup> | KC584210        | KC584129        | KC584418        | KC584676        | JQ905111        |
| <i>Alternaria photistica</i>    | CBS 212.86 <sup>T</sup> | KC584212        | KC584131        | KC584420        | KC584678        | -               |
| <i>Alternaria porri</i>         | CBS 116698              | DQ323700        | KC584132        | KC584421        | KC584679        | KJ718726        |
| <b><i>Alternaria</i></b>        | <b>ZHKUCC 22-0146</b>   | <b>OP120855</b> | <b>OP160290</b> | <b>OP160284</b> | <b>OP160281</b> | <b>OP160287</b> |
| <b><i>pogostemonis</i></b>      |                         |                 |                 |                 |                 |                 |
| <i>Alternaria pogostemonis</i>  | <b>ZHKUCC 22-0147</b>   | <b>OP120856</b> | <b>OP160291</b> | <b>OP160285</b> | <b>OP160282</b> | <b>OP160288</b> |
| <i>Alternaria pogostemonis</i>  | <b>ZHKUCC 22-0148</b>   | <b>OP120857</b> | <b>OP160292</b> | <b>OP160286</b> | <b>OP160283</b> | <b>OP160289</b> |
| <i>Alternaria prunicola</i>     | MFLUCC 18–1598          | MH827032        | MH853646        | MH853719        | MH853704        | MH853693        |
| <i>Alternaria prunicola</i>     | MFLUCC 18–1596          | MH827033        | MH853647        | MH853720        | MH853705        | MH853694        |
| <i>Alternaria prunicola</i>     | JZB3180005              | MH827034        | MH853648        | MH853721        | MH853706        | MH853695        |
| <i>Alternaria prunicola</i>     | JZB3180006              | MH827035        | MH853649        | MH853722        | MH853707        | MH853696        |
| <i>Alternaria prunicola</i>     | MFLUCC 18–1597          | MH827036        | MH853650        | MH853723        | MH853708        | MH853697        |
|                                 | <sup>T</sup>            |                 |                 |                 |                 |                 |
| <i>Alternaria prunicola</i>     | MFLUCC 18–1599          | MH827037        | MH853651        | MH853724        | MH853709        | MH853698        |
| <i>Alternaria prunicola</i>     | JZB3180013              | MH827042        | MH853656        | MH853729        | MH853714        | -               |

|                                  |                         |          |          |          |          |          |
|----------------------------------|-------------------------|----------|----------|----------|----------|----------|
| <i>Alternaria</i>                | MFLUCC 18–1589          | MH827030 | MH853644 | MH853717 | MH853702 | -        |
| <i>pseudoeichhorniae</i>         | <sup>T</sup>            |          |          |          |          |          |
| <i>Alternaria pseudorostrata</i> | CBS 119411 <sup>T</sup> | JN383483 | AY562406 | KC584422 | KC584680 | -        |
| <i>Alternaria radicina</i>       | CBS 245.67 <sup>T</sup> | KC584213 | KC584133 | KC584423 | KC584681 | FN689405 |
| <i>Alternaria saponariae</i>     | CBS 116492              | KC584215 | KC584135 | KC584425 | KC584683 | -        |
| <i>Alternaria septospora</i>     | CBS 109.38              | FJ266489 | FJ266500 | KC584487 | KC584747 | FJ266515 |
| <i>Alternaria simsimi</i>        | CBS 115265 <sup>T</sup> | JF780937 | KC584137 | KC584428 | KC584686 | JQ905110 |
| <i>Alternaria solani</i>         | CBS 116651              | KC584217 | KC584139 | KC584430 | KC584688 | -        |
| <i>Alternaria sonchi</i>         | CBS 119675              | KC584220 | KC584142 | KC584433 | KC584691 | -        |
| <i>Alternaria sp.</i>            | CBS 115.44              | KC584214 | KC584134 | KC584424 | KC584682 | -        |
| <i>Alternaria tagetica</i>       | CBS 479.81              | KC584221 | KC584143 | KC584434 | KC584692 | KJ718761 |
| <i>Alternaria tenuissima</i>     | CBS 918.96              | AF347032 | AY278809 | KC584435 | KC584693 | AY563302 |
| <i>Alternaria terricola</i>      | CBS 202.67 <sup>T</sup> | FJ266490 | KC584177 | KC584490 | KC584750 | FJ266516 |
| <i>Alternaria tomato</i>         | CBS 103.30              | KP124445 | KP124294 | KP124915 | KP125224 | KP123991 |
| <i>Alternaria tomato</i>         | CBS 114.35              | KP124446 | KP124295 | KP124916 | KP125225 | KP123992 |
| <i>Alternaria vaccariicola</i>   | CBS 118714 <sup>T</sup> | KC584224 | KC584147 | KC584439 | KC584697 | -        |
| <i>Alternaria alternantherae</i> | CBS 124392              | KC584179 | KC584096 | KC584374 | KC584633 | KP123846 |
| <i>Stemphylium botryosum</i>     | ATCC 42170 <sup>T</sup> | AF229481 | AY278820 | JQ905202 | JQ672391 | AY563274 |

Abbreviations of isolates and culture collections: ATCC ATCC ATCC—American Type Culture Collection, Virginia, USA; CBS—Centraalbureau voor Schimmelcultures, Utrecht, Netherlands; MFLUCC—Mae Fah Luang University Culture Collection, Chiang Rai, Thailand; JZB—Culture collection of Institute of Plant and Environment Protection, Beijing Academy of Agriculture and Forestry Sciences (China); ZHKUCC—Culture collection of Zhongkai University of Agriculture and Engineering. Sequences produced in this study are shown in red. <sup>T</sup> Indicates ex-type/ex-epitype isolates.
